# Supplementary material for: People Deaths and Injuries Caused by Lightning in Himalayan Region, Nepal
Source: Hindawi journal article supplement (doi:10.1155/2022/3630982), 2022-06-11
Supplement: f1 [file 3630982.f1.docx]

# **People Deaths and Injuries Caused by Lightning in Himalayan Region, Nepal**

Pitri Bhakta Adhikari,

Department of Physics, Tri - Chandra M. Campus, Tribhuvan University, Kathmandu, Nepal

**eMail:** pbadhikari09@gmail.com

The lightning thunderstorm occurred maximum in Makawanpur district in which the number of lightning events upto 157 incidents in this period from January, 2011 to December, 2021 and then second highest is Jhapa district, occurred 84 incidents. Similarly among the higher lightning events occurred among the 77 districts, 25 districts were represented in rank during this period is expressed in the following Table 1. The bar diagram of the districts occurred maximum number of lightning events is expressed in the Figure 1 below.

**Table 1**: The Districts occurred maximum number of lightning incidents since 2011.

| S. N. | Districts | Death of the People | Number of Incidents | Number of Injured People | Ranked of districts on the basis of the lightning incidents |
| --- | --- | --- | --- | --- | --- |
| 1 | Makawanpur | 75 | 157 | 277 | 1 |
| 2 | Jhapa | 29 | 84 | 52 | 2 |
| 3 | Morang | 49 | 77 | 47 | 3 |
| 4 | Udayapur | 39 | 74 | 62 | 4 |
| 5 | Khotang | 25 | 64 | 102 | 5 |
| 6 | Okhaldunga | 33 | 56 | 69 | 6 |
| 7 | Sindhuli | 26 | 52 | 69 | 7 |
| 8 | Shankhuwasabha | 16 | 52 | 39 | 8 |
| 9 | Achhaam | 15 | 50 | 124 | 9 |
| 10 | Solukhumbu | 25 | 49 | 71 | 10 |
| 11 | Nuwakot | 24 | 49 | 50 | 11 |
| 12 | Saptari | 29 | 47 | 36 | 12 |
| 13 | Dang | 21 | 47 | 28 | 13 |
| 14 | Ilam | 16 | 47 | 31 | 14 |
| 15 | Baglung | 19 | 46 | 76 | 15 |
| 16 | Pyuthan | 16 | 46 | 78 | 16 |
| 17 | Gulmi | 18 | 45 | 81 | 17 |
| 18 | Bhojpur | 16 | 45 | 29 | 18 |
| 19 | Rolpa | 17 | 44 | 37 | 19 |
| 20 | Kavre | 23 | 38 | 39 | 20 |
| 21 | Dailekh | 9 | 38 | 45 | 21 |
| 22 | Dolakha | 20 | 37 | 57 | 22 |
| 23 | Sindhupalcowk | 19 | 36 | 66 | 23 |
| 24 | Kaski | 13 | 36 | 24 | 24 |
| 25 | Dhading | 21 | 35 | 44 | 25 |

Among the seventy seven districts, two districts, Manang and Mustang have no lightning phenomena during this period. Lightning injuries and deaths are always not accurately reported because lightning most often strikes not to the large groups only the individuals and the information therefore is scattered and mostly uncounted.

Similarly, in the three districts Dolpa, Rasuwa, and Humla, have no casualty during this period is shown in Table 2 below. In this Table 2, the name of the districts with some data are presented in rank, on the basis of minimum number of lightning events and casualty. The bar diagram of the districts occurred minimum number of lightning events is also expressed in the Figure 2. Similarly, on analyzing the data of this two districts have maximum so the number of incidents, casualty and number of injured people also recorded and presented here since January, 2011 annually is tabulated here in Table 3 and the bar diagram of the yearly events of these two districts also expressed in the Figures 3 and 4 respectively.

**Figure 1**: The Bar diagram of the district lightning occurred maximum number of events.

**Table 2**: The Districts occurred minimum number of lightning incidents in the mentioned period

| S. N. | District | No. of death People | No. of incidents | No. of injured People |
| --- | --- | --- | --- | --- |
| 1 | Manag | 0 | 0 | 0 |
| 2 | Mustang | 0 | 0 | 0 |
| 3 | Dolpa | 0 | 1 | 6 |
| 4 | Rasuwa | 0 | 2 | 2 |
| 5 | Nawalpur | 1 | 5 | 7 |
| 6 | Mugu | 2 | 5 | 11 |
| 7 | Kathmandu | 1 | 6 | 6 |
| 8 | Lalitpur | 3 | 6 | 4 |
| 9 | Humla | 0 | 7 | 0 |
| 10 | Bhaktapur | 1 | 7 | 8 |
| 11 | Parasi | 11 | 9 | 14 |
| 12 | Kalikot | 4 | 11 | 24 |
| 13 | Jumla | 5 | 12 | 10 |
| 14 | Rukum East | 5 | 12 | 11 |
| 15 | Gorkha | 6 | 14 | 12 |
| 16 | Banke | 6 | 16 | 14 |
| 17 | Mahottari | 11 | 17 | 13 |
| 18 | Siraha | 13 | 17 | 11 |
| 19 | Bajhang | 3 | 18 | 24 |
| 20 | Palpa | 5 | 18 | 23 |
| 21 | Kapilbastu | 8 | 18 | 2 |

**Figure 2**: The Bar diagram of the district lightning occurred minimum number of events since 2011.

**Table 3**: Maximum Lightning occurred in Makawanpur and Jhapa districts in the last decade expressed yearly.

| Year | Makawanpur | | | Jhapa | | |
| --- | --- | --- | --- | --- | --- | --- |
| Death of the People | No. of Incidents | No. of Injured People | Death of the People | No. of Incidents | No. of Injured People |
| 2011 | 8 | 6 | 9 | 3 | 7 | 4 |
| 2012 | 2 | 12 | 17 | 4 | 8 | 5 |
| 2013 | 10 | 16 | 32 | 2 | 2 | 0 |
| 2014 | 12 | 13 | 23 | 4 | 8 | 5 |
| 2015 | 11 | 12 | 25 | 4 | 4 | 5 |
| 2016 | 11 | 20 | 30 | 1 | 6 | 3 |
| 2017 | 4 | 8 | 11 | 1 | 5 | 8 |
| 2018 | 7 | 17 | 37 | 4 | 14 | 8 |
| 2019 | 7 | 32 | 49 | 5 | 16 | 10 |
| 2020 | 3 | 16 | 37 | 0 | 8 | 3 |
| 2021 | 0 | 5 | 7 | 1 | 6 | 1 |
| Total | 75 | 157 | 277 | 29 | 84 | 52 |

**Figure 3**: Maximum Lightning occurred in Makawanpur districts since 2011 expressed annually.

**Figure 4**: Lightning occurred in Jhapa districts since 2011 expressed yearly.
